# Supplementary material
Source: PubMed Central journal article supplement (PMC7424704)
Supplement: ao0c02396_si_001.pdf [file ao0c02396_si_001.pdf]

## **SUPPORTING INFORMATION**

### **One-day TALEN Assembly Protocol and a Dual-Tagging system for Genome Editing**

Shuyan Zhang<sup>¶</sup>, Jun Wang<sup>¶</sup>, and Jinke Wang\*

*State Key Laboratory of Bioelectronics, Southeast University, Nanjing 210096, China*

**Table S1. Primers for TALE monomers amplification and colony PCR**

| Name        | Sequence (5'→3')                                                                                              | Usage                                           |
|-------------|---------------------------------------------------------------------------------------------------------------|-------------------------------------------------|
| PCR-TAL-F   | TATCATCATGCCTCCTCTAGAG                                                                                        | monomer amplification<br>(universal primer)     |
| PCR-TAL-R   | TTGGTCATGGGTGGCTCGAGG                                                                                         |                                                 |
| PCR-TAL-F1  | TATCATCATGCCTCCTCTAGAGGTCTCCCTATCTTAAAC<br>CGGCCAACATAACCCGTCTCCCCCTGAACCTGACCCCGG<br>ACCAAGTGGTGGCTATCGCCAGC | First monomer amplification                     |
| PCR-TAL-R5  | TTGGTCATGGGTGGCTCGAGGGTCTCCATA<br>GAGTCTGTCTTTCCCCTTTCCCCTCTCCTGCACCG                                         | Fifth monomer amplification                     |
| PCR-TAL-F6  | TATCATCATGCCTCCTCTAGAGGTCTCCCTATCTTAAAC<br>CGGCCAACATAACCCGTCTCGTGCAGCGGC                                     | Sixth monomer amplification                     |
| PCR-TAL-R10 | TTGGTCATGG GTGGCTCGAG GGTCTCCATA<br>GAGTCTGTCT TTCCCCTTTC CCGTCTCCC GCC                                       | Tenth monomer amplification                     |
| PCR-TAL-F11 | TATCATCATGCCTCCTCTAGAGGTCTCATGGCCTGACCC<br>CGGACCAAGTGGTGGCTATCGCCAGC                                         | Eleven monomer amplification                    |
| PCR-TAL-R14 | TTGGTCATGG GTGGCTCGAG GGTCTCCTCG<br>AAGTCTGTCT TTCCCCTTTC CCGTCTCCAACAGCCG                                    | Fourteenth monomer<br>amplification             |
| PCR-TAL-F15 | TATCATCATGCCTCCTCTAGAGGTCTCCTCGACTTAAAC<br>CGGCCAACATAACCCGTCTCCTGTTGCCGG                                     | Fifteenth monomer amplification                 |
| PCR-TAL-F18 | TATCATCATGCCTCCTCTAGAGGTCTCGCTATCGCCAGC                                                                       | Eighteenth monomer<br>amplification             |
| PCR-TAL-R18 | TTGGTCATGGGTGGCTCGAGGGTCTCTTTCGAAGTCTGTC<br>TTCCCCTTTCCCCTCTCCTGTTGGTCAAC                                     | Eighteenth monomer<br>amplification             |
| TAL-F       | TTGGCGTCGGCAAACAGTGG                                                                                          | Colony PCR amplification and<br>TALE sequencing |
| TAL-R       | GGCGACGAGGTGGTTCGTTGG                                                                                         | Colony PCR amplification and<br>TALE sequencing |

**Table S2. Synthetic double-stranded DNA**

| Name                  | Encoded chain sequence (5'→3')                                                                                                                                 |
|-----------------------|----------------------------------------------------------------------------------------------------------------------------------------------------------------|
| dsDNA <sub>10.5</sub> | TATCATCATGCCTCCTCTAGAGGTCTCCTCGACTTAAACCGGCCAACATAACCCGTCTCTGG<br>CGGCAAGCAAGCGCTCGAAACGGTGCAGCGGCTGTTGCCGGTGCTGTGCCAGGACCATG<br>GCCGAGACCCTCGAGCCACCCATGACCAA |
| dsDNA <sub>17.5</sub> | TATCATCATGCCTCCTCTAGAGGTCTCCGAAACGGTGCAGCGGCTGTTGCCGGTGCTGTGC<br>CAGGACCATGGCCTGACCCCGGACCAAGTGGTGGCTATCGAGACCCTCGAGCCACCCATG<br>ACCAA                         |

**Table S3. Primers vector and homology arm preparation and clone identification**

| Name                 | Sequence (5'→3')                                                | Usage                                                                            |
|----------------------|-----------------------------------------------------------------|----------------------------------------------------------------------------------|
| FokI-F               | CCGGAATTCCTAGTGAAATCTGAATTGGAAG                                 | FokI amplification                                                               |
| FokI-R               | AAGGAAAAAAGCGGCCGCTTAAAAGTTTATCTCACCG                           |                                                                                  |
| 5-RELA-hom-F         | TGGACTTCTCAGCCCTGCTGAGTCAGATCAGCTCCGGA<br>GGAGGTTCCGGTGGAGGTGG  | RELA homology arm<br>amplification                                               |
| 3-RELA-hom-SBP-R     | TCAATCCCCTGCAACCCAGTGCTCTGGGGAGGGCATTAA<br>AGGGCAAGGAGTGTGGCACC |                                                                                  |
| 3-RELA-hom-AviTag-R  | TCAATCCCCTGCAACCCAGTGCTCTGGGGAGGGCACTA<br>ACGTGGCTTCTTCTGCCAAAG |                                                                                  |
| 5-RELB-hom-F         | GGGGCGGCCCTCTATCCCCGGGGCTGAAGCCACGGGA<br>GGAGGTTCCGGTGGAGGTGG   | RELB homology arm<br>amplification                                               |
| 3-RELB-hom-SBP-R     | TTGCACGGCTCCTCCACCTCCCTCCCCACCCAGTGTTAA<br>AGGGCAAGGAGTGTGGCACC |                                                                                  |
| 3-RELB-hom-AviTag-R  | TTGCACGGCTCCTCCACCTCCCTCCCCACCCAGTGCTAA<br>CGTGGCTTCTTCTGCCAAAG |                                                                                  |
| 5-CREL-hom-F         | TGAGTGACTCCTTTCCATATGAATTTTTCAAGTAGGAG<br>GAGGTTCCGGTGGAGGTGG   | CREL homology arm<br>amplification                                               |
| 3-CREL-hom-SBP-R     | CCCAGTTAGACAAATACAAAATGCTGCATCTATATTTAAA<br>GGGCAAGGAGTGTGGCACC |                                                                                  |
| 3-CREL-hom-AviTag-R  | CCCAGTTAGACAAATACAAAATGCTGCATCTATATCTAAC<br>GTGGCTTCTTCTGCCAAAG |                                                                                  |
| 5-NFKB1-hom-F        | ATTATGGGCAGGAAGGACCTCTAGAAGGCAAATTTGGA<br>GGAGGTTCCGGTGGAGGTGG  | NFKB1 homology arm<br>amplification                                              |
| 3-NFKB1-hom-SBP-R    | AGCTTCTGTCTTGTGGACAACGCAGTGGAATTTATTAA<br>AGGGCAAGGAGTGTGGCACC  |                                                                                  |
| 3-NFKB1-hom-AviTag-R | AGCTTCTGTCTTGTGGACAACGCAGTGGAATTTACTAA<br>CGTGGCTTCTTCTGCCAAAG  |                                                                                  |
| 5-NFKB2-hom-F        | GGCTCTGCCACGGGCACCCCAGCCTCAGGTGCACGGA<br>GGAGGTTCCGGTGGAGGTGG   | NFKB2 homology arm<br>amplification                                              |
| 3-NFKB2-hom-SBP-R    | GGTGTGGGGTGTTAAATAAGATTTGAAATAGGTGGTTAA<br>AGGGCAAGGAGTGTGGCACC |                                                                                  |
| 3-NFKB2-hom-AviTag-R | GGTGTGGGGTGTTAAATAAGATTTGAAATAGGTGGCTAA<br>CGTGGCTTCTTCTGCCAAAG |                                                                                  |
| Lac-px-F             | ACGGTCTCGCACCGGGTCTTCAGCGCCCAATACGCAAA<br>CCGCCTC               | Lac amplification                                                                |
| Lac-px-R             | TCGGTCTCCAAACAGGTCTTCGCGTCCATTGCCATTCA<br>GGCTGCGC              |                                                                                  |
| U6-test-F            | GAGGGCCTATTTCCCATGATTC                                          | NF-κB-targeting<br>psgRNA-Cas9 positive<br>clone identification by<br>colony PCR |
| RELA-sgRNA-test-R    | CTTAGGAGCT GATCTGACTC                                           |                                                                                  |
| RELB-sgRNA-test-R    | CTCCTCTGGCATCGCGGGGC                                            |                                                                                  |
| CREL-sgRNA-test-R    | TTTAAATCTT GATACCACCT                                           |                                                                                  |
| NFKB1-sgRNA-test-R   | CACCGTGTA ACCAAAGCCC                                            |                                                                                  |
| NFKB2-sgRNA-test-R   | CTTCCCGGACCCCCTGTACA                                            |                                                                                  |

**Table S4. Designed TALEN targets**

| Name              | Sequence (5'→3')    |
|-------------------|---------------------|
| RELA-left-TALEN   | CTGAGTCAGATCAGCTCC  |
| RELA-right-TALEN  | AGTGCTCTGGGGAGGGCA  |
| RELB-left-TALEN   | CCGGGGCCTGAAGCCACG  |
| RELB-right-TALEN  | CCCCACCCAGTGCCCCCTC |
| CREL-left-TALEN   | TATGAATTTTTTCAA GTA |
| CREL-right-TALEN  | ATCAAGATTTAAAAGGAT  |
| NFKB1-left-TALEN  | CCTCTAGAAGGCCAAAATT |
| NFKB1-right-TALEN | TTGGTTTACACGGTGTGG  |
| NFKB2-left-TALEN  | CCCCAGCCTCAGGTGCAC  |
| NFKB2-right-TALEN | CCGGGAAGGGGGCTGGGG  |

**Table S5. Designed sgRNA targets**

| Name            | sequence (5'→3')        |
|-----------------|-------------------------|
| RELA-sgRNA-PAM  | GAGTCAGATCAGCTCCTAAGGGG |
| RELB-sgRNA-PAM  | GCCCCGCGATGCCAGAGGAGGGG |
| CREL-sgRNA-PAM  | AGGTGGTATCAAGATTTAAAAGG |
| NFKB1-sgRNA-PAM | GGGCTTTGGTTTACACGGTGTGG |
| NFKB2-sgRNA-PAM | TGTACAGGGGGTCCGGGAAGGGG |

**Table S6. Oligonucleotide used to prepare target-specific regions (20 bp) of sgRNA**

| Gene  | Name        | Sequence (5'→3')                                           |
|-------|-------------|------------------------------------------------------------|
| RELA  | RELA-sg-S   | 5'-AGGAAGACGGCACCGGGAGTCAGATCAGCTCCTAAGGTTTGGGTCTTCGA-3'   |
|       | RELA-sg-AS  | 5'-TCGAAGACCCAAACCTTAGGAGCT GATCTGACTCCCAGGTGCCGTCTTCCT-3' |
| RELB  | RELB-sg-S   | 5'-AGGAAGACGGCACCGGGCCCCGCGATGCCAGAGGAGGTTTGGGTCTTCGA-3'   |
|       | RELB-sg-AS  | 5'-TCGAAGACCCAAACCTCCTCTGGCATCGCGGGGCCCGGTGCCGTCTTCCT-3'   |
| CREL  | CREL-sg-S   | 5'-AGGAAGACGGCACCGGAGGTGGTATCAAGATTTAAAGTTTGGGTCTTCGA-3'   |
|       | CREL-sg-AS  | 5'-TCGAAGACCCAAACTTTAAATCTT GATACCACCTCCGGTGCCGTCTTCCT-3'  |
| NFKB1 | NFKB1-sg-S  | 5'-AGGAAGACGGCACCGGGGGCTTTGGTTTACACGGTGGTTTGGGTCTTCGA-3'   |
|       | NFKB1-sg-AS | 5'-TCGAAGACCCAAACCACCGTGTA ACCAAAGCCCCCGGTGCCGTCTTCCT-3'   |
| NFKB2 | NFKB2-sg-S  | 5'-AGGAAGACGGCACCGGTGTACAGGGGGTCCGGGAAGGTTTGGGTCTTCGA-3'   |
|       | NFKB2-sg-AS | 5'-TCGAAGACCCAAACCTTCCCGGACCCCTGTACACCGGTGCCGTCTTCCT-3'    |

S, sense; AS, antisense

**Table S7. Primers for verifying homologous recombination**

| Name    | Sequence (5'→3')                     | Usage                             |
|---------|--------------------------------------|-----------------------------------|
| RELA-F  | TGGACTTCTCAGCCCTGCTGAGTCAGATCAGCTCC  | RELA editing detection with qPCR  |
| IRES2-R | GACTCTTTCCACAACCTATCCAACCTCACAACGTGG |                                   |
| RELB-F  | GGGGCGGCCTCCTATCCCCGGGGCCTGAAGCCACG  | RELB editing detection with qPCR  |
| IRES2-R | GACTCTTTCCACAACCTATCCAACCTCACAACGTGG |                                   |
| CREL-F  | TGAGTGACTCCTTTCCATATGAATTTTTTCAAGTA  | CREL editing detection with qPCR  |
| IRES2-R | GACTCTTTCCACAACCTATCCAACCTCACAACGTGG |                                   |
| NFKB1-F | ATTATGGGCAGGAAGGACCTCTAGAAGGCAAAT    | NFKB1 editing detection with qPCR |
| IRES2-R | GACTCTTTCCACAACCTATCCAACCTCACAACGTGG |                                   |
| NFKB2-F | GGCTCTGCCACGGGCACCCCAGCCTCAGGTGCAC   | NFKB2 editing detection with qPCR |
| IRES2-R | GACTCTTTCCACAACCTATCCAACCTCACAACGTGG |                                   |

## Vectors and their elements and sequences

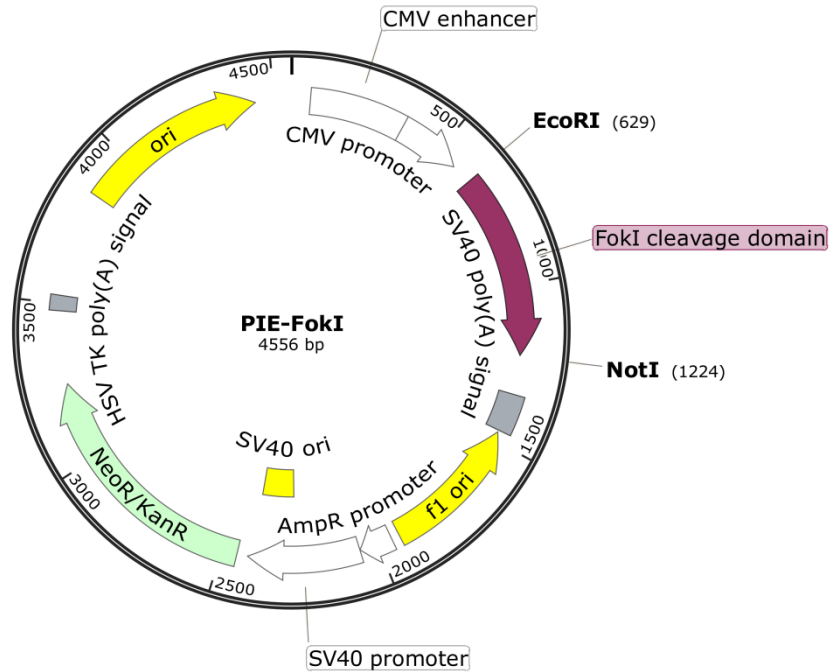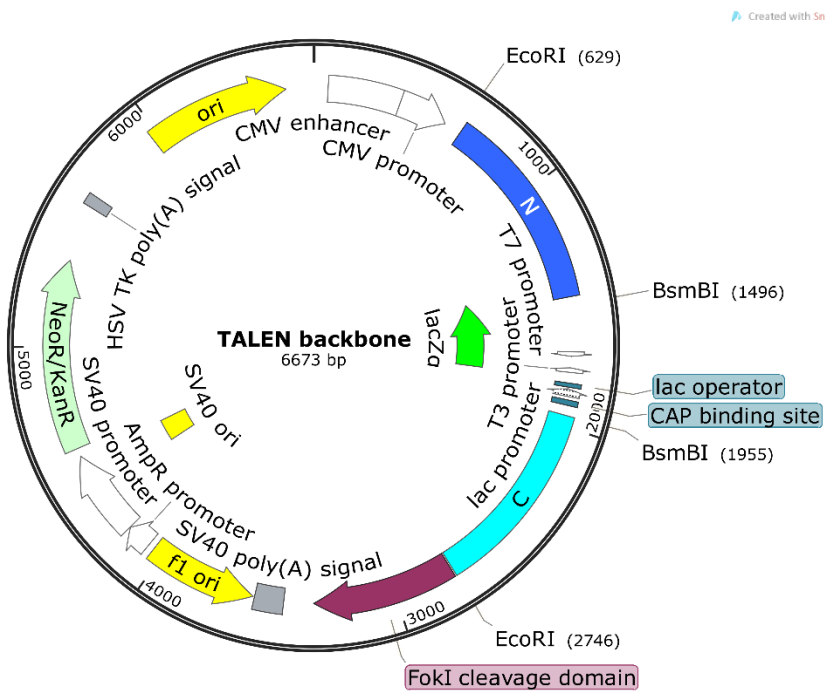

CMV enhancer + CMV promoter + N-term of TALE + Repeating sequence area of TALE instead of LacZa + C-term of TALE + FokI cleavage domain

```
CGTTACATAACTTACGGTAAATGGCCCGCCTGGCTGACCGCCCAACGACCCCGCCATTGACG
TCAATAATGACGTATGTTCCCATAGTAACGCCAATAGGGACTTTCATTGACGTCAATGGGTGG
AGTATTTACGGTAAACTGCCCACTTGGCAGTACATCAAGTGTATCATATGCCAAGTACGCCCCCT
ATTGACGTCAATGACGGTAAATGGCCCGCCTGGCATTATGCCAGTACATGACCTTATGGGACT
TTCTACTTGGCAGTACATCTACGTATTAGTCATCGCTATTACCATGGTGATGCGGTTTTGGCAG
```

TACATCAATGGGCGTGGATAGCGGTTTACTCACGGGGATTCCAAAGTCTCCACCCATTGACG  
TCAATGGGAGTTTGTGGTGGCACCAAATCAACGGGACTTTCCAAAATGTCGTAACAACCTCCG  
CCCCATTGACGCAAATGGGCGGTAGGCGGTACGGTGGGAGGTCTATATAAGCAGAGCTATGG  
ATCCATTTCGTCGCGCAGGCCAAGTCCTGCCGCGAGCTTCTGCCCGGACCCCAACCGGATA  
GGGTTAGCCGACTGCAGATCGTGGGGTGTCTGCGCCTGCTGGCAGCCCTCTGGATGGCTTGC  
CCGCTCGGCGGACGGTGTCCCGGACCCGGCTGCCATCTCCCCCTGCGCCCTCACCTGCGTTCT  
CGGCGGGCAGCTTCAGCGATCTGCTCCGTCGTTTCGATCCGTCGCTTCTTGATACATCGCTTCTT  
GATTTCGATGCCTGCCGTCCGCACGCCGCATACAGCGGCTGCCCCAGCAGAGTGGGATGAGGCG  
CAATCGGCTCTGCGTGCAGCCGATGACCCGCCACCCACCGTGCCTGTCGCTGTCACTGCCGCG  
CGGCCCGCGCGCCAAGCCGGCCCCGCGACGGCGTGTGCGCAACCCTCCGACGCTTCGCC  
GGCCGCGCAGGTGGATCTACGCACGCTCGGCTACAGTCAGCAGCAGCAAGAGAAGATCAAAC  
CGAAGGTGCGTTCGACAGTGGCGCAGCACCACGAGGCACTGGTGGGCCATGGGTTTACACAC  
GCGCACATCGTTGCGCTCAGCCAAACCCGGCAGCGTTAGGGACCGTTCGCTGTCACGTATCAG  
CACATAATCACGGCGTTGCCAGAGGCGACACACGAAGACATCGTTGGCGTCCGCAAACAGTG  
GTCCGGCGCACGCGCCCTGGAGGCCTTGCTACGGATGCGGGGGAGTTGAGAGGTCCGCCGT  
TACAGTTGGACACAGGCCAACTTGTGAAGATTGCAAACGTGGCGGGCGTGACCCGAATGGAG  
GCAGTGCATGCCCTGGAGACGGGCGCCGCTACAGGGCGCGTCCATTTCGCCATTACGGCTGCG  
CAACTGTTGGGAAGGGCGATCGGTGCGGGCCTCTTCGCTATTACGCCAGCTGGCGAAAGGGGG  
ATGTGCTGCAAGGCGATTAAGTTGGGTAACGCCAGGGTTTTCCAGTCACGACGTTGTAAAC  
GACGGCCAGTGAGCGCGCGTAATACGACTCACTATAGGGCGAATTGGGTACCGGGCCCCCT  
CGAGGTCCTCCAGCTTTTGTTCCTTTAGTGAGGGTTAATTGCGCGCTTGCGGTAATCATGGTC  
ATAGCTGTTTCTGTGTGAAATTGTTATCCGCTCACAATTCCACACAACATACGAGCCGGAAGC  
ATAAAGTGTAAGCCTGGGGTGCCTAATGAGTGAGCTAACTCACATTAATTGCGTTGCGCTCAC  
TGCCCCGTTTCCACCGGTCTCTCCACGACCACCTCGTCGCTTGGCCTGCCTCGGCGGACGT  
CCTGCCATGGATGCAGTGAAAAAGGGATTGCCGCACGCGCCGGAATTGATCAGAAGAGTCAAT  
CGCCGTATTGGCGAACGCACGTCCCATCGCGTTGCCGACTACGCGCAAGTGGTTTCGCGTGCTG  
GAGTTTTTCCAGTGCCACTCCCACCCAGCGTACGCATTTGATGAGGCCATGACGCAGTTCGGG  
ATGAGCAGGAACGGGTTGGTACAGCTCTTTCGCGAGAGTGGGCGTCAACGAACTCGAAGCCCG  
CGGTGGAACGCTCCCCCAGCCTCGCAGCGTTGGGACCGTATCCTCCAGGCATCAGGGATGAA  
AAGGGCAAACCGTCCCCTACTTCAGCTCAAACACCGGATCAGGCGTCTTTCATGCATTTCGC  
CGATTTCGCTGGAGCGTGACCTTGATGCGCCAGCCCAATGCACGAGGGAGATCAGACGCGGG  
CAAGCAGCCGTAAACGGTCCCGATCGGATCGTGCTGTCACCGGCCCTCCGCACAGCAGGCTG  
TCGAGGTGCGCGTTCCCGAACAGCGCGATGCGCTGCATTTGCCCTCAGCTGGAGGGTAAAC  
GCCCCGTACCAGGATCTGGGGCGGCCTCCCGGATCCCTGGTACGCCATGGCTGCCGACCTG  
GCAGCGTCCAGCACCGTGATGTGGGAACAAGATGCGGACCCCTTCGCGAGGGGCAGCGGATGA  
TTTCCCGGCATTCAACGAAGAGGAACTCGCATGGTTGATGGAGCTATTGCCTCAGAAGCTAGT  
GAAATCTGAATTGGAAGAGAAGAAATCTGAACTTAGACATAAATTGAAATATGTGCCACATGA  
ATATATTGAATTGATTGAAATCGCAAGAAATCAACTCAGGATAGAATCCTTGAAATGAAGGTG  
ATGGAGTTCTTTATGAAGGTTTATGGTTATCGTGGTAAACATTTGGGTGGATCAAGGAAACCAG  
ACGGAGCAATTTATACTGTCGGATCTCCTATTGATTACGGTGTGATCGTTGATACTAAGGCATATT  
CAGGAGGTTATAATCTTCCAATTGGTCAAGCAGATGAAATGCAAAGATATGTCGAAGAGAATCA  
ACAAGAAACAAGCATATCAACCCTAATGAATGGTGGAAAGTCTATCCATCTTCAGTAACAGA  
ATTTAAGTTCTTGTGGTGTGAGTGGTCATTTCAAAGGAAACTACAAAGCTCAGTTACAAGATTG

AATCATATCACTAATTGTAATGGAGCTGTTCTTAGTGTAGAAGAGCTTTTGATTGGTGGAGAAAT  
GATTAAAGCTGGTACATTGACACTTGAGGAAGTGAGAAGGAAATTTAATAACGGTGAGATAAA  
CTTTAA



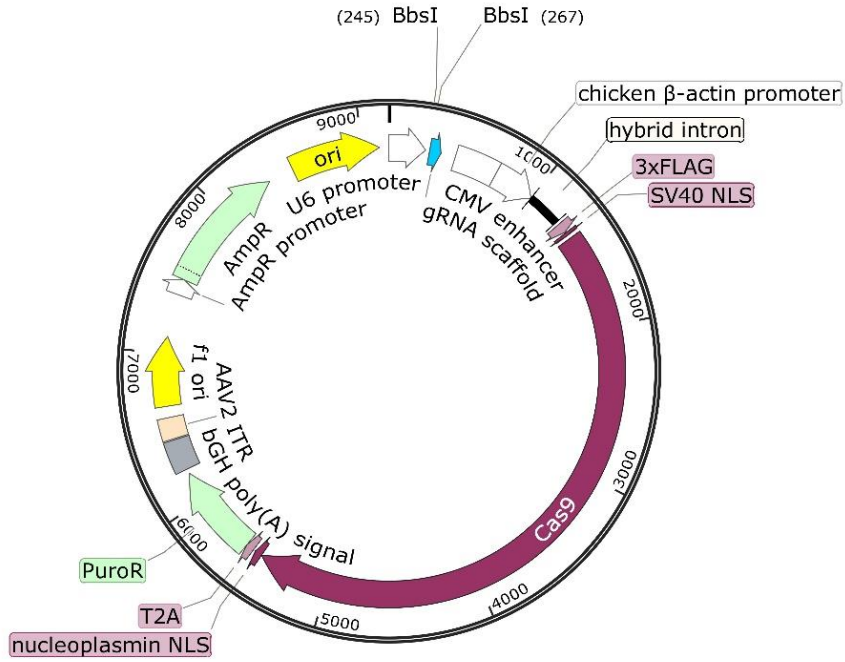

**pSpCas9(BB)-2A-Puro (PX459) V2.0(addgene)**  
9175 bp

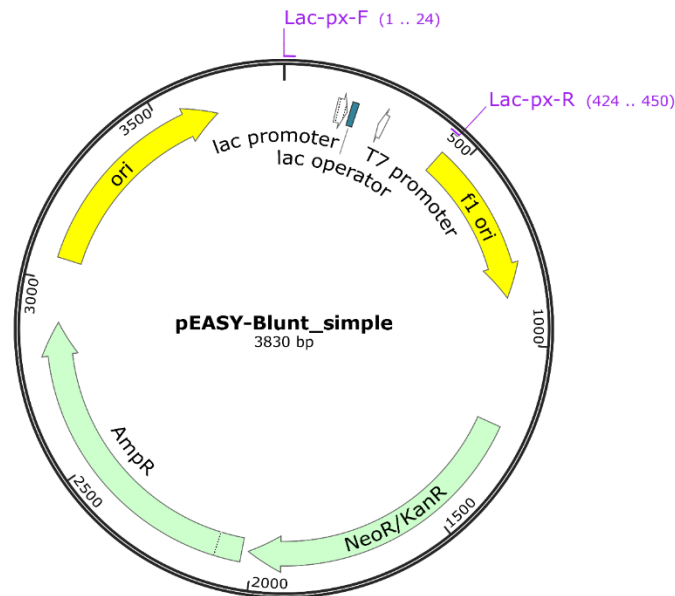

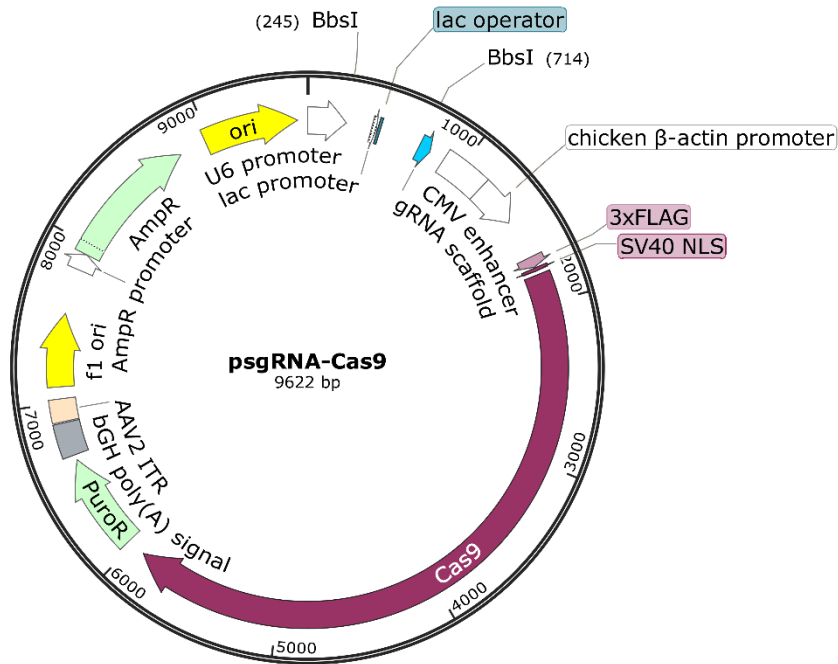

U6 promoter+BbsI+lac+BbsI+gRNA scaffold+CMV enhance+chicken  $\beta$ -actin promoter  
 +3xFLAG+SV40 NLS+Cas9+PuroR

GAGGGCCTATTTCCCATGATTCCTTCATATTTGCATATACGATACAAGGCTGTTAGAGAGATAAAT  
 GGAATTAATTTGACTGTAAACACAAAGATATTAGTACAAAATACGTGACGTAGAAAGTAATAAT  
 TTCTTGGGTAGTTTGCAGTTTTAAAATATGTTTTAAAATGGACTATCATATGCTTACCGTAACTT  
 GAAAGTATTTGATTTCTTGGCTTTATATATCTTGTGAAAGGACGAAA**CACCGGGTCTTC**AGC  
 GCCAATACGCAAACCGCCTCTCCCCGCGCGTTGGCCGATTCATTAATGCAGCTGGCAGCACA  
 GGTTTCCCGACTGGAAAGCGGGCAGTGAGCGCAACGCAATTAATGTGAGTTAGCTCACTCATT  
 AGGCACCCAGGCTTTACACTTTATGCTTCCGGCTCGTATGTTGTGTGGAATTGTGAGCGGATA  
 ACAATTTACACAGGAAACAGCTATGACCATGATTACGCCAAGCTGCCCTTAAGGGCAGCTTC  
 AATTCGCCCTATAGTGAGTCGTATTACAATCACTGGCCGTCGTTTTACAACGTCGTGACTGGG  
 AAAACCCCTGGCGTTACCCAACCTAATCGCCTTGACGACATCCCCCTTCGCCAGCTGGCGTAA  
 TAGCGAAGAGGCCCGCACCGATCGCCCTTCCCAACAGTTGCGCAGCCTGAATGGCGAATGGAC  
 GC**GAAGACCTGTTT**TAGAGCTAGAAATAGCAAGTTAAAATAAGGCTAGTCCGTTATCAACTTGA  
 AAAAGTGGCACCGAGT**CGGTGC**TTTTTTGTTTTAGAGCTAGAAATAGCAAGTTAAAATAAGGC  
 TAGTCCGTTTTTAGCGCGTGCGCCAATTCTGCAGACAAATGGCTCTAGAGGTACCCGTTACATA  
 ACTTACGGTAAATGGCCCGCCTGGCTGACCGCCAACGACCCCCGCCATTGACGTCAATAGT  
 AACGCCAATAGGGACTTTCCATTGACGTCAATGGGTGGAGTATTTACGGTAAACTGCCACTTG  
 GCAGTACATCAAGTGTATCATATGCCAAGTACGCCCCCTATTGACGTCAATGACGGTAAATGGC  
 CCGCCTGGCATTGTGCCAGTACATGACCTTATGGGACTTTCCTACTTGGCAGTACATCTACGTA  
 TTAGTCATCGCTATTACCATGGTCGAGGTGAGCCCCACGTTCTGCTTCACTCTCCCATCTCCCC  
 CCCCTCCCCACCCCAATTTTGTATTTATTTATTTTAAATATTTTGTGTCAGCGATGGGGGGCGGG  
 GGGGGGGGGGGGGCGCGGCCAGGCGGGGGCGGGGGCGAGGGGGCGGGGGCGGGGGCGAG

GCGGAGAGGTGCGGCGGCAGCCAATCAGAGCGGCGCGCTCCGAAAGTTTCCTTTTATGGCGA  
GGCGGCGGCGGCGGCGGCCCTATAAAAAGCGAAGCGCGCGGGCGGGAGTCGCTGCGAC  
GCTGCCTTCGCCCCGTGCCCGCTCCGCCGCCGCTCGCGCCGCCCGCCCCGGCTCTGACTGA  
CCGCGTTACTCCACAGGTGAGCGGGCGGGACGGCCCTTCTCCTCCGGGCTGTAATTAGCTGA  
GCAAGAGGTAAGGGTTTAAGGGATGGTTGGTTGGTGGGGTATTAATGTTTAATTACCTGGAGCA  
CCTGCCTGAAATCACTTTTTTTCAGGTTGGACCGGTGCCACCATGGACTATAAGGACCACGACG  
GAGACTACAAGGATCATGATATTGATTACAAAGACGATGACGATAAGATGGCCCCAAAGAAGA  
AGCGGAAGGTTCGGTATCCACGGAGTCCCAGCAGCCGACAAGAAGTACAGCATCGGCCTGGAC  
ATCGGCACCAACTCTGTGGGCTGGGCCGTGATCACCGACGAGTACAAGGTGCCAGCAAGAA  
ATTCAAGGTGCTGGGCAACACCGACCGGCACAGCATCAAGAAGAACCTGATCGGAGCCCTGC  
TGTTTCGACAGCGGCGAAACAGCCGAGGCCACCCGGCTGAAGAGAACC GCCAGAAGAAGATA  
CACCAGACGGAAGAACCGGATCTGCTATCTGCAAGAGATCTTCAGCAACGAGATGGCCAAGGT  
GGACGACAGCTTCTTCCACAGACTGGAAGAGTCCCTCCTGGTGGAAAGAGGATAAGAAGCACG  
AGCGGCACCCATCTTCGGCAACATCGTGGACGAGGTGGCCTACCACGAGAAGTACCCACCA  
TCTACCACCTGAGAAAGAAACTGGTGGACAGCACCGACAAGGCCGACCTGCGGCTGATCTATC  
TGGCCCTGGCCCACATGATCAAGTTCCGGGGCCACTTCTGATCGAGGGCGACCTGAACCCCG  
ACAACAGCGACGTGGACAAGCTGTTTCATCCAGCTGGTGCAGACCTACAACCAGCTGTTTCGAG  
GAAAACCCCATCAACGCCAGCGGCGTGGACGCCAAGGCCATCCTGTCTGCCAGACTGAGCAA  
GAGCAGACGGCTGGAAAATCTGATCGCCAGCTGCCCGGCAGAGAAGAAGAATGGCCTGTTCG  
GAAACCTGATTGCCCTGAGCCTGGGCCCTGACCCCAACTTCAAGAGCAACTTCGACCTGGCCG  
AGGATGCCAAACTGCAGCTGAGCAAGGACACCTACGACGACGACCTGGACAACCTGCTGGCC  
CAGATCGGCGACCAGTACGCCGACCTGTTTCTGGCCGCCAAGAACCTGTCCGACGCCATCCTG  
CTGAGCGACATCCTGAGAGTGAACACCGAGATACCAAGGCCCCCTGAGCGCCTCTATGATC  
AAGAGATACGACGAGCACCACCAGGACCTGACCCTGCTGAAAGCTCTCGTGCGGCAGCAGCT  
GCCTGAGAAGTACAAAGAGATTTTCTTCGACCAGAGCAAGAACGGCTACGCCGGCTACATTGA  
CGGCGGAGCCAGCCAGGAAGAGTTCTACAAGTTCATCAAGCCCATCCTGGAAAAGATGGACG  
GCACCGAGGAAGTCTCGTGAAGCTGAACAGAGAGGACCTGCTGCGGAAGCAGCGGACCTTC  
GACAACGGCAGCATCCCCCACCAGATCCACCTGGGAGAGCTGCACGCCATTCTGCGGCGGCA  
GGAAGATTTTTTACCATTCTGAAGGACAACCGGAAAAGATCGAGAAGATCCTGACCTTCCG  
CATCCCCTACTACGTGGGCCCTCTGGCCAGGGGAAAACAGCAGATTCGCCTGGATGACCAGAAA  
GAGCGAGGAAACCATACCCCTGGAACCTTCGAGGAAAGTGGTGGACAAGGGCGCTTCCGCC  
AGAGCTTCATCGAGCGGATGACCAACTTCGATAAGAACCTGCCCAACGAGAAGGTGCTGCCA  
AGCACAGCCTGCTGTACGAGTACTTCACCGTGTATAACGAGCTGACCAAAGTGAATAACGTGA  
CCGAGGGAATGAGAAAGCCCGCCTTCTGAGCGGCGAGCAGAAAAAGGCCATCGTGGACCTG  
CTGTTCAAGACCAACCGGAAAGTGACCGTGAAGCAGCTGAAAGAGGACTACTTCAAGAAAAT  
CGAGTGCTTCGACTCCGTGGAAATCTCCGGCGTGGAAAGATCGGTTCAACGCCTCCCTGGGCAC  
ATACCACGATCTGCTGAAAATTATCAAGGACAAGGACTTCTGGACAATGAGGAAAACGAGGA  
CATTCTGGAAGATATCGTGTGACCTGACACTGTTTGAGGACAGAGAGATGATCGAGGAACG  
GCTGAAAACCTATGCCACCTGTTTCGACGACAAAGTGATGAAGCAGCTGAAGCGGCGGAGAT  
ACACCGGCTGGGGCAGGCTGAGCCGGAAGCTGATCAACGGCATCCGGGACAAGCAGTCCGGC  
AAGACAATCCTGGATTTCTGAAGTCCGACGGCTTCGCCAACAGAACTTCATGCAGCTGATC  
CACGACGACAGCCTGACCTTTAAAGAGGACATCCAGAAAGCCCAGGTGTCCGGCCAGGGCGA  
TAGCCTGCACGAGCACATTGCCAATCTGGCCGGCAGCCCCGCCATTAAGAAGGGCATCCTGCA  
GACAGTGAAGGTGGTGGACGAGCTCGTGAAGTGATGGGCCGGCACAAGCCCAGAAACATCG

TGATCGAAATGGCCAGAGAGAACCAGACCACCCAGAAGGGACAGAAGAACAGCCGCGAGAG  
AATGAAGCGGATCGAAGAGGGCATCAAAGAGCTGGGCAGCCAGATCCTGAAAGAACACCCCG  
TGAAAAACACCCAGCTGCAGAACGAGAAGCTGTACCTGTACTACCTGCAGAATGGGCGGGAT  
ATGTACGTGGACCAGGAACCTGGACATCAACCGGCTGTCCGACTACGATGTGGACCATATCGTG  
CCTCAGAGCTTTCTGAAGGACGACTCCATCGACAACAAGGTGCTGACCAGAAGCGACAAGAA  
CCGGGGCAAGAGCGACAACGTGCCCTCCGAAGAGGGTCGTGAAGAAGATGAAGAACTACTGGC  
GGCAGCTGCTGAACGCCAAGCTGATTACCCAGAGAAAAGTTCGACAATCTGACCAAGGCCGAG  
AGAGGCGGCCTGAGCGAACTGGATAAGGCCGGCTTCATCAAGAGACAGCTGGTGGAAACCCG  
GCAGATCACAAAGCACGTGGCACAGATCCTGGACTCCCGGATGAACACTAAGTACGACGAGA  
ATGACAAGCTGATCCGGGAAGTGAAAGTGATCACCCCTGAAGTCCAAGCTGGTGTCCGATTTC  
GGAAGGATTTCCAGTTTTTACAAAGTGCGCGAGATCAACAACCTACCACCACGCCACGACGCCT  
ACCTGAACGCCGTCGTGGGAACCGCCCTGATCAAAAAGTACCCTAAGCTGGAAAGCGAGTTC  
GTGTACGGCGACTACAAGGTGTACGACGTGCGGAAGATGATCGCCAAGAGCGAGCAGGAAAT  
CGGCAAGGCTACCGCCAAGTACTTCTTCTACAGCAACATCATGAACTTTTTTCAAGACCGAGATT  
ACCCTGGCCAACGGCGAGATCCGGAAGCGGCCTCTGATCGAGACAAACGGCGAAACCGGGGA  
GATCGTGTGGGATAAGGGCCGGGATTTTGCCACCGTGCGGAAAGTGCTGAGCATGCCCAAGT  
GAATATCGTGAAAAAGACCGAGGTGCAGACAGGGCGGCTTCAGCAAAGAGTCTATCCTGCCCA  
AGAGGAACAGCGATAAGCTGATCGCCAGAAAGAAGGACTGGGACCCTAAGAAGTACGGCGGC  
TTCGACAGCCCCACCGTGGCCTATTCTGTGCTGGTGGTGGCCAAAGTGGAAGGGCAAGTCC  
AAGAACTGAAGAGTGTGAAAGAGCTGCTGGGGATCACCATCATGGAAAGAAGCAGCTTCGA  
GAAGAATCCCATCGACTTTCTGGAAGCCAAGGGCTACAAAGAAGTGAAAAAGGACCTGATCA  
TCAAGCTGCCTAAGTACTCCCTGTTCGAGCTGGAAAACGGCCGGAAGAGAATGCTGGCCTCTG  
CCGGCGAACTGCAGAAGGGAAACGAACTGGCCCTGCCCTCCAAATATGTGAACTTCCTGTACC  
TGGCCAGCCACTATGAGAAGCTGAAGGGCTCCCCGAGGATAATGAGCAGAAACAGCTGTTTG  
TGGAACAGCACAAAGCACTACCTGGACGAGATCATCGAGCAGATCAGCGAGTTCTCCAAGAGA  
GTGATCCTGGCCGACGCTAATCTGGACAAAGTGCTGTCCGCCTACAACAAGCACCGGGATAAG  
CCCATCAGAGAGCAGGCCGAGAATATCATCCACCTGTTTACCCTGACCAATCTGGGAGCCCCTG  
CCGCCTTCAAGTACTTTGACACCACCATCGACCGGAAGAGGTACACCAGCACCAAAGAGGTG  
CTGGACGCCACCCTGATCCACCAGAGCATCACCGGCCTGTACGAGACACGGATCGACCTGTCT  
CAGCTGGGAGGCGACAAAAGGCCGGCGGCCACGAAAAAGGCCGGCCAGGCAAAAAAGAAA  
AAGGAATTCGGCAGTGGAGAGGGCAGAGGAAGTCTGCTAACATGCGGTGACGTCGAGGAGAA  
TCCTGGCCCAATGACCGAGTACAAGCCCACGGTGCGCCTCGCCACCCGCGACGACGTCCCCA  
GGCCCGTACGCACCCTCGCCGCCGCGTTCGCCGACTACCCCGCCACGCGCCACACCGTCGATC  
CGGACCGCCACATCGAGCGGGTCACCGAGCTGCAAGAACTCTTCCTCACGCGCGTCGGGCTC  
GACATCGGCAAGGTGTGGGTCGCGGACGACGGCGCCGCGGTGGCGGTCTGGACCACGCCGGA  
GAGCGTCGAAGCGGGGGCGGTGTTCCGCCGAGATCGGCCCGCGCATGGCCGAGTTGAGCGGTT  
CCCGGCTGGCCGCGCAGCAACAGATGGAAGGCCTCCTGGCGCCGACCCGGCCCAAGGAGCCC  
GCGTGGTTCCTGGCCACCGTCGGAGTCTCGCCCCGACCACCAGGGCAAGGGTCTGGGCAGCGC  
CGTCGTGCTCCCCGAGTGGAGGGCGGCCGAGCGCGCCGGGGTGGCCGCTTCCTGGAGACCT  
CCGCGCCCCGCAACCTCCCCTTCTACGAGCGGCTCGGCTTCACCGTCACCGCCGACGTCGAGG  
TGCCCGAAGGACCGCGCACCTGGTGCATGACCCGCAAGCCCGGTGCCTGA

## HDR donor: SBP-IRES2-displaySBP

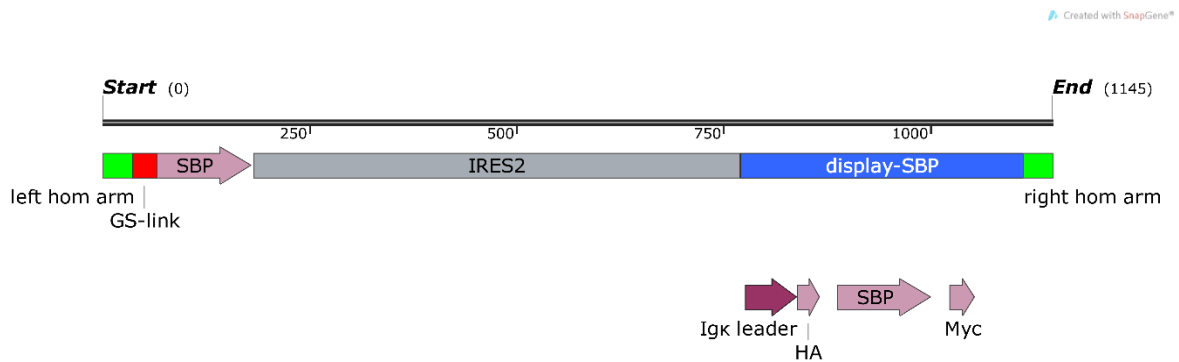

Left hom arm+GSlink+SBP+IRES2+display-SBP+right hom arm

Left hom arm+ ggaggaggttcgggtggaggtggttctgga+  
 ATGGACGAGAAGACCACCGGTGGCGGGGCGGCCACGTTGTGGAGGGCCTCGCTGGCGAGCT  
 GGAGCAGCTCAGGGCCCGCTTGGAGCACCATCCCAGGGGCAACGCGAGCCTTAA+CCCCCTCT  
 CCTCCCCCCCCCTAACGTTACTGGCCGAAGCCGCTTGAATAAGGCCGGTGTGCGTTTGTCT  
 ATATGTTATTTTCCACCATATTGCCGCTCTTTTGGCAATGTGAGGGCCCGGAAACCTGGCCCTGTC  
 TTCTTGACGAGCATTCCCTAGGGGTCTTTCCCTCTCGCCAAAGGAATGCAAGGTCTGTTGAATG  
 TCGTGAAGGAAGCAGTTCCTCTGGAAGCTTCTTGAAGACAAACAACGTCTGTAGCGACCCTTT  
 GCAGGCAGCGGAACCCCCACCTGGCGACAGGTGCCTCTGCGGCCAAAAGCCACGTGTATAA  
 GATACACCTGCAAAGGCGGCACAACCCAGTGCCACGTTGTGAGTTGGATAGTTGTGGAAAG  
 AGTCAAATGGCTCTCCTCAAGCGTATTCAACAAGGGGCTGAAGGATGCCCAGAAGGTACCCCA  
 TTGTATGGGATCTGATCTGGGGCCTCGGTGCACATGCTTTACATGTGTTTAGTCGAGGTTAAAA  
 AAACGTCTAGGCCCCCCGAACCACGGGACGTGGTTTTTCCTTTGAAAAACACGATGATAATAT  
 GGCCACAACC+GCCACCATGGAGACAGACACACTCCTGCTATGGGTACTGCTGCTCTGGGTTTC  
 CAGGTTCCACTGGTGACTATCCATATGATGTTCCAGATTATGCTGGGGCCAGCCGGCCAGATC  
 TATGGACGAGAAGACCACCGGTGGCGGGGCGGCCACGTTGTGGAGGGcCTCGCTGGCGAGC  
 TGGAGCAGCTCAGGGCCCGCTTGGAGCACCATCCCAGGGGCAACGCGAGCCTATCGATAAA  
 ACTGCAGGTCGACGAACAAAACTCATCTCAGAAGAGGATCTGAATGCTGTGGGCCAGGACA  
 CGCAGGAGGTCATCGTGGTGCCACACTCCTTGCCCTTAA+right hom arm

**HDR donor: AviTag-IRES2-display AviTag**

Created with SnapGene®

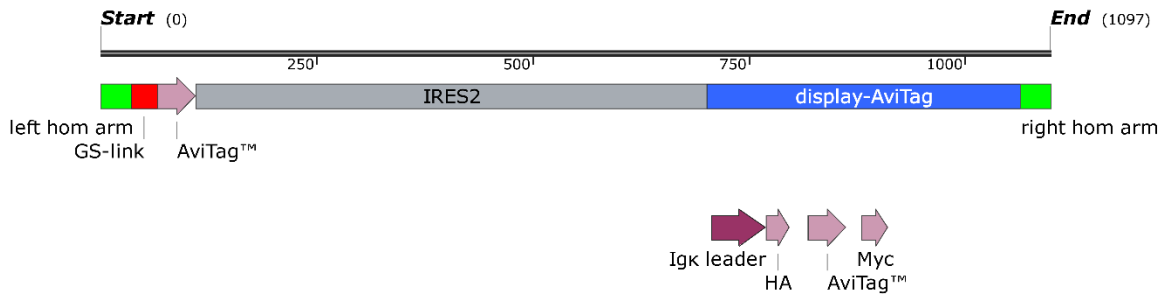

Left hom arm+ **ggaggaggttcggtggaggtggttctgga+**  
**GGCCTGAACGACATCTTCGAGGCTCAGAAAATCGAATGGCACGAATAA+**CCCCCTCCCTCCC  
 CCCCCCTAACGTTACTGGCCGAAGCCGCTTGAATAAGGCCGGTGTGCGTTTGTCTATATGTT  
 ATTTTCCACCATATTGCCGTCTTTTGGCAATGTGAGGGCCCGAAACCTGGCCCTGTCTTCTTG  
 ACGAGCATTCTAGGGGTCTTTCCCCTCTCGCCAAAGGAATGCAAGGTCTGTTGAATGTCGTG  
 AAGGAAGCAGTTCCTCTGGAAGCTTCTTGAAGACAAACAACGTCTGTAGCGACCCTTTGCAG  
 GCAGCGGAACCCCCACCTGGCGACAGGTGCCTCTGCGGCCAAAAGCCACGTGTATAAGATAC  
 ACCTGCAAAGGCGGCACAACCCAGTGCCACGTTGTGAGTTGGATAGTTGTGGAAAGAGTCA  
 AATGGCTCTCCTCAAGCGTATTCAACAAGGGGCTGAAGGATGCCCAGAAGGTACCCCATGTA  
 TGGGATCTGATCTGGGGCCTCGGTGCACATGCTTTACATGTGTTTAGTCGAGGTTAAAAAACG  
 TCTAGGCCCCCGAACACGGGGACGTGGTTTTCTTTGAAAAACACGATGATAATATGGCCA  
 CAACC+GCCACCATGGAGACAGACACACTCCTGCTATGGGTACTGCTGCTCTGGGTTCAGGT  
 TCCACTGGTGACTATCCATATGATGTTCCAGATTATGCTGGGGCCAGCCGGCCAGATCTGGCC  
 TGAACGACATCTTCGAGGCTCAGAAAATCGAATGGCACGAAATCGATCTGCAGGTCGACGAAC  
 AAAAATCATCTCAGAAGAGGATCTGAATGCTGTGGGCCAGGACACGCAGGAGGTCATCGTG  
 GTGCCACACTCCTTGCCCTTTAAGGTGGTGGTGTCTCAGCCATCCTGGCCCTGGTGGTGCTCA  
 CCATCATCTCCCTTATCATCCTCATCATGCTTTGGCAGAAGAAGCCACGTTAG+right hom arm

| Day | Duration  | Task                                                                 |
|-----|-----------|----------------------------------------------------------------------|
| 1   | 1 day     | Synthesis of two oligos containing sgRNA target                      |
| 2   | 1 hour    | Annealing of two oligos to form dsDNA for cloning                    |
|     | 3 hours   | Cloning of dsDNA into sgRNA-Cas9 plasmid by Golden-gate cut-ligation |
|     | 2 hours   | Transformation of the Golden-gate cut-ligation product               |
|     | overnight | Growth of transformed competent cells                                |
| 3   | 6 hours   | Colony PCR to identify positive clones and amplified culture         |
|     | 1 hour    | Plasmid preparation                                                  |

**Figure S1.** Pipeline for constructing custom CRISPR/Cas9-sgRNA expression vector (plasmid). Time used in each step was given. The whole procedure can be finished in three days.

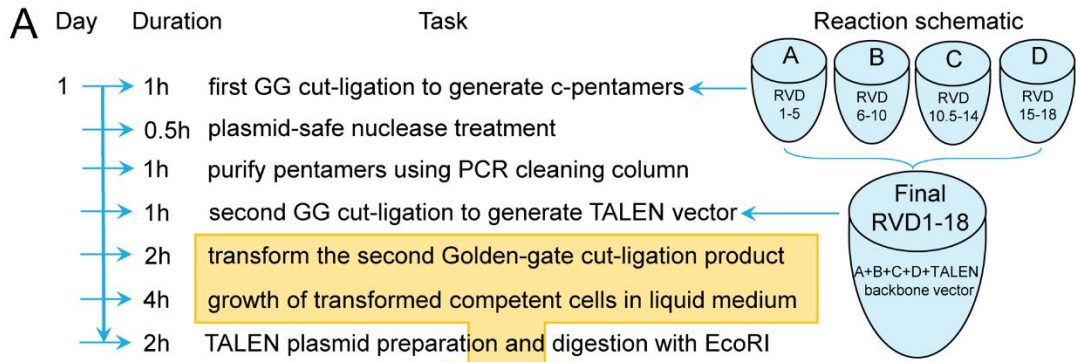

- At the end of the second Golden-gate cut-ligation reaction, the total of 20  $\mu\text{L}$  reaction product was then used to transform the competent *E. coli* DH5 $\alpha$  (Tiangen, China).
- The transformed DH5 $\alpha$  (200  $\mu\text{L}$ ) was added with 800  $\mu\text{L}$  LB media and incubated at 37°C for 1 h.
- The total of 1 mL bacterial fluid was added into 5 mL LB media containing 100  $\mu\text{g}/\text{mL}$  kanamycin and cultured at 37°C for 4 h.

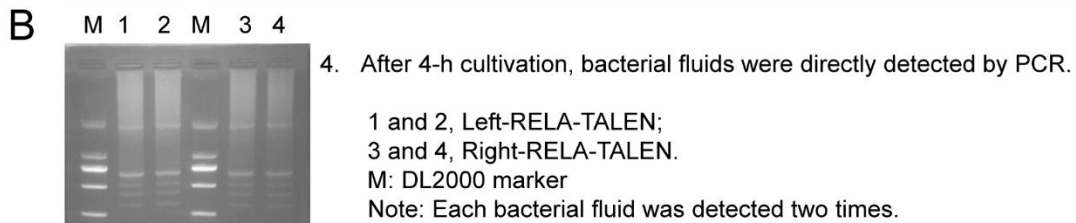

**C**

| # | Sample ID | User name | Date and Time       | Nucleic Acid Conc. | Unit              | A260  | A280  | 260/280 | 260/230 | Sample Type | Factor |
|---|-----------|-----------|---------------------|--------------------|-------------------|-------|-------|---------|---------|-------------|--------|
| 1 |           | admin     | 2019-12-28 13:44:18 | 238.0              | ng/ $\mu\text{L}$ | 4.760 | 2.425 | 1.96    | 2.29    | DNA         | 50.00  |
| 2 |           | admin     | 2019-12-28 13:45:55 | 213.2              | ng/ $\mu\text{L}$ | 4.265 | 2.173 | 1.96    | 2.31    | DNA         | 50.00  |

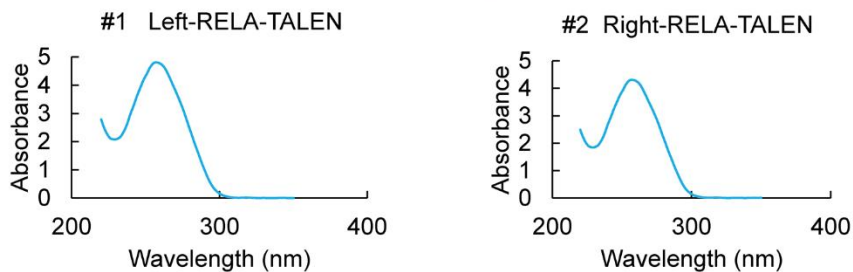

- Plasmid DNA was extracted from all culture media (6 mL) with the EndoFree Plasmid kit. Plasmid DNA was quantified with NanoDrop. Totally 120  $\mu\text{L}$  DNA solution was obtained for each TALEN. As a result, as total as 28.6  $\mu\text{g}$  (Left-RELA-TALEN) and 25.6  $\mu\text{g}$  (Right-RELA-TALEN) plasmid DNA was obtained for each TALEN.

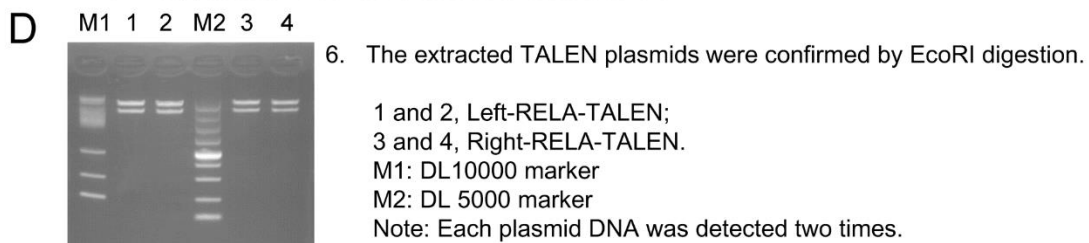

The obtained 28.6  $\mu\text{g}$  (Left-RELA-TALEN) and 25.6  $\mu\text{g}$  (Right-RELA-TALEN) plasmid DNA are sufficient for the transfection of as many as  $6.25 \times 10^7$  cells (125 wells of 24-well plate,  $5 \times 10^5$  cells/well for transfection), from which as many as  $6 \times 10^6$  cells positive cells (i.e. successfully edited cells) can be obtained according to the editing efficiency of 9.75% .



**Figure S2.** Preparation of TALEN expression plasmid just in one day. Steps 1–6 describes the whole process. (A) Pipeline for constructing custom TALEN with linear monomers and TALEN backbone plasmid. Time used in each step was given. The detail protocol for Step 1–3 were provided. (B) Detection of PCR products of bacterial fluids. (C) quantification of purified TALEN plasmid DNA. (D) Detection of purified TALEN plasmid DNA with agarose gel electrophoresis.

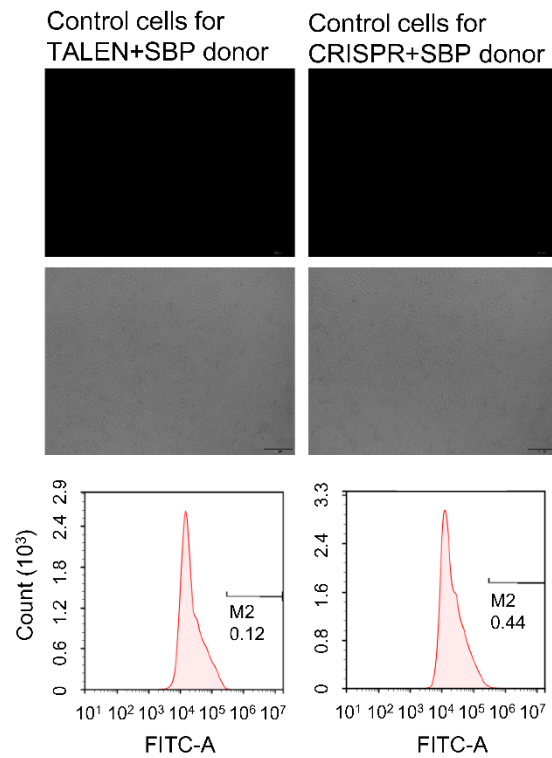

**Figure S3.** Editing five NF- $\kappa$ B genes with TALEN and CRISPR (control cells). The controls cells were just transfected with lipofectin. The Cells were stained with Alexa Fluor® 488-conjugated Streptavidin and imaged with fluorescence microscope (up) and quantitative analyzed with flow cytometry (down).
